# Supplementary material for: Membraneless, self-powered immunosensing of a cardiac biomarker by exploiting a PEC platform based on CaBi2Ta2O9 combined with bismuth oxyiodides
Source: Royal Society of Chemistry journal article supplement (doi:10.1039/d3ay01309j), 2023-01-01
Supplement: d3ay01309j1.pdf [file d3ay01309j1.pdf]

## Supplementary Material

### **Membraneless self-powered immunosensing for a cardiac biomarker exploiting a PEC platform based on $\text{CaBi}_2\text{Ta}_2\text{O}_9$ combined to bismuth oxyiodides**

*Greicy Kelly Cerqueira Caldas,<sup>a</sup> Guilherme de Abreu Souza,<sup>a</sup> Alan Silva de Menezes,<sup>b</sup> Silma Regina Ferreira Pereira,<sup>c</sup> Rita de Cássia Silva Luz<sup>\*,a</sup> and Flavio Santos Damos<sup>\*,a</sup>*

<sup>a</sup>. Department of Chemistry, Federal University of Maranhão-UFMA, 65080-805, São Luís, MA, Brazil.

<sup>b</sup>. Department of Physics, Federal University of Maranhão-UFMA, 65080-805, São Luís, MA, Brazil.

<sup>c</sup>. Department of Biology, Federal University of Maranhão-UFMA, 65080-805, São Luís, MA, Brazil.

[\\*flavio.damos@ufma.br](mailto:*flavio.damos@ufma.br); [rita.luz@ufma.br](mailto:rita.luz@ufma.br) (e-mail of the corresponding autor)

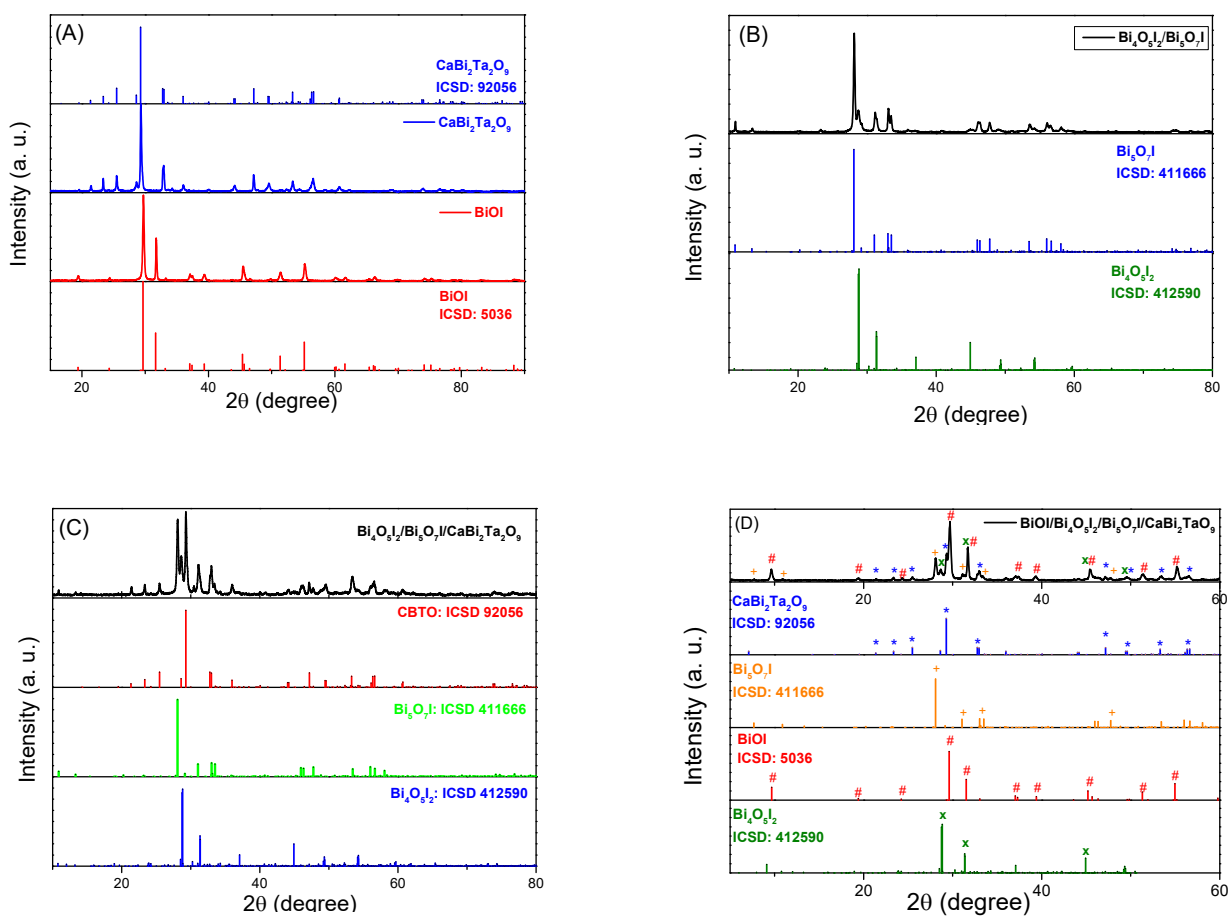

Fig. S1 XRD pattern of (A)  $\text{CaBi}_2\text{Ta}_2\text{O}_9$  and  $\text{BiOI}$ , (B)  $\text{Bi}_4\text{O}_5\text{I}/\text{Bi}_5\text{O}_7\text{I}$ , (C)  $\text{Bi}_4\text{O}_5\text{I}_2/\text{Bi}_5\text{O}_7\text{I}/\text{CaBi}_2\text{Ta}_2\text{O}_9$ , and (D)  $\text{BiOI}/\text{Bi}_4\text{O}_5\text{I}_2/\text{Bi}_5\text{O}_7\text{I}/\text{CaBi}_2\text{Ta}_2\text{O}_9$  composite.

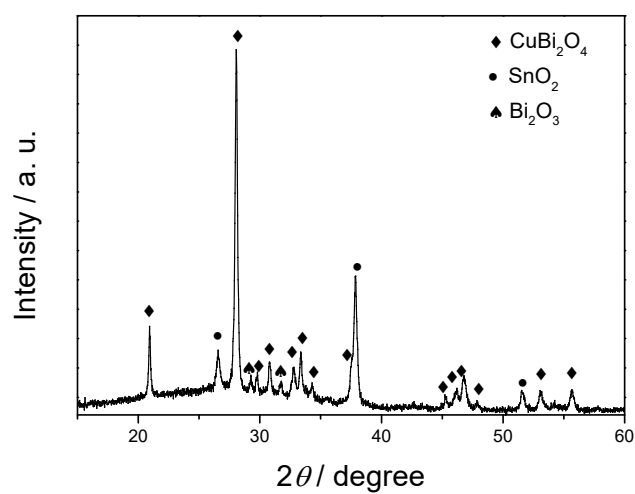

Fig. S2 DRX pattern of photocathode

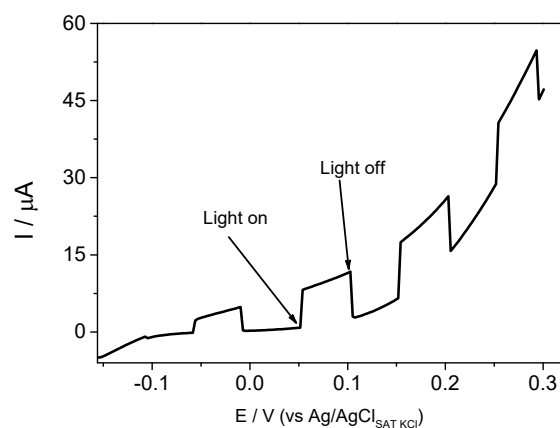

Fig. S3 Chopped light potential vs current curve shows the behavior of the BiOI/Bi<sub>4</sub>O<sub>5</sub>I<sub>2</sub>/Bi<sub>5</sub>O<sub>7</sub>I/CaBi<sub>2</sub>Ta<sub>2</sub>O<sub>9</sub>/FTO platform under light and dark conditions in 10 mmol L<sup>-1</sup> of tert-Butylhydroquinone (TBHQ) in 0.1 mol L<sup>-1</sup> HEPES (pH 7).

**Table S1.** Recovery values for cTnI detection in human plasma samples using the anti-cTnI/BiOI/Bi<sub>4</sub>O<sub>5</sub>I<sub>2</sub>/Bi<sub>5</sub>O<sub>7</sub>I/CaBi<sub>2</sub>Ta<sub>2</sub>O<sub>9</sub>/FTO immunosensor employed as photoanode in a two-electrode electrochemical cell.

| Sample | Spiked / pg mL <sup>-1</sup> | Found / pg mL <sup>-1</sup> | Recovery / % | RSD / % (n=3) |
|--------|------------------------------|-----------------------------|--------------|---------------|
| A      | 10                           | 10.8                        | 108          | 5.46          |
| B      | 20000                        | 19138                       | 95.7         | 1.55          |
| C      | 100000                       | 96315                       | 96.3         | 1.52          |
